# Supplementary material for: Ultrasound Assessment of Carotid Plaque Echogenicity Response to Statin Therapy: A Systematic Review and Meta-Analysis
Source: PubMed Central journal article supplement (PMC4463673; doi:10.3390/ijms160510734), 2015-05-12
Supplement: ijms-16-10734-s001.pdf [file ijms-16-10734-s001.pdf]

# Supplementary Information

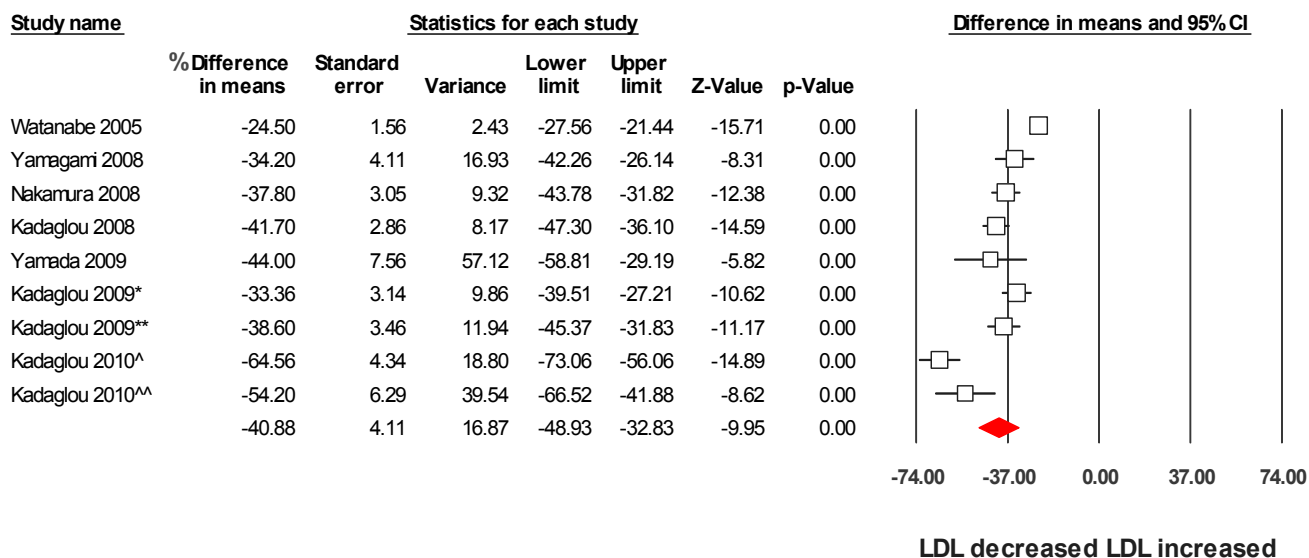

**Figure S1.** Effect of statins on LDL. Note: Kadaglou 2009 [17] has divided and analyzed patients into two groups: the first group (\*) was on statin, but underwent contralateral carotid artery stenting (CAS), and the second group (\*\*) was treated only with statins. Kadaglou 2010 [18] has divided and analyzed patients into two groups: the first group (^) received atorvastatin 10–20 mg and the second group (^^) atorvastatin 80 mg.

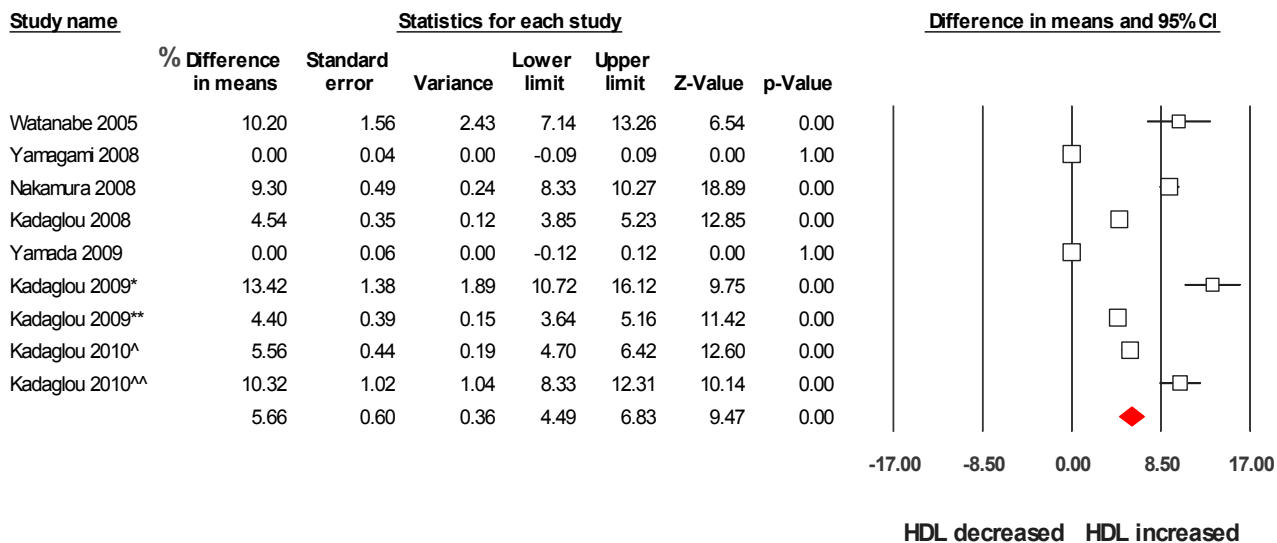

**Figure S2.** Effects of statins on HDL. Note: Kadaglou 2009 [17] has divided and analyzed patients into two groups: the first group (\*) was on statin, but underwent contralateral carotid artery stenting (CAS), and the second group (\*\*) was treated only with statins. Kadaglou 2010 [18] has divided and analyzed patients into two groups: the first group (^) received atorvastatin 10–20 mg and the second group (^^) atorvastatin 80 mg.

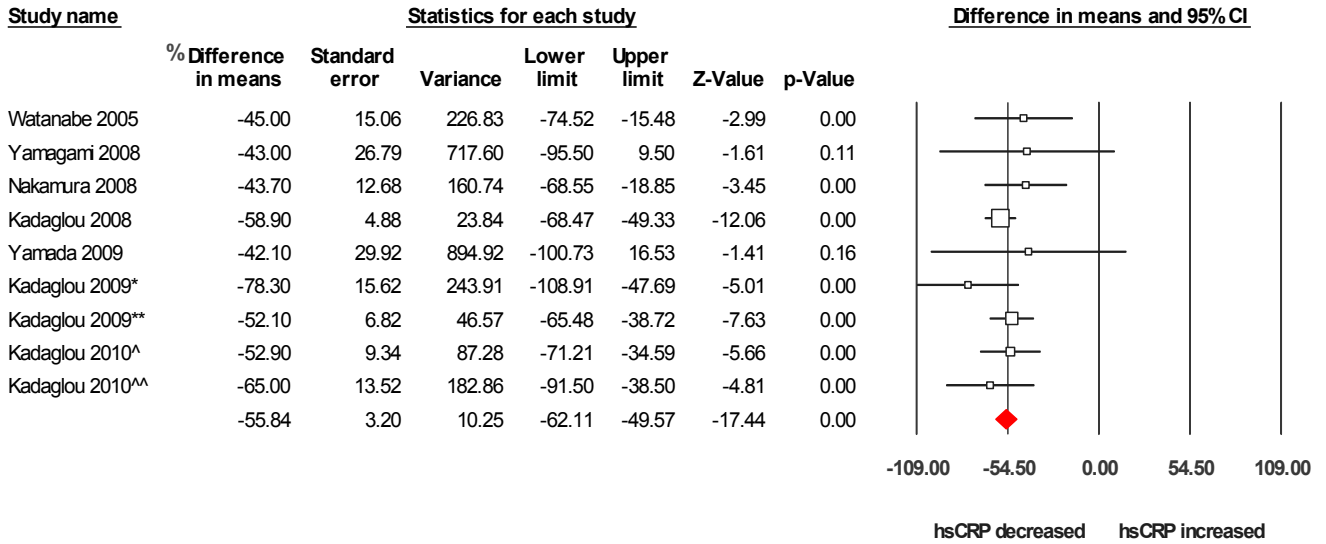

**Figure S3.** Effects of statins on hsCRP. Note: Kadaglou 2009 [17] has divided and analyzed patients into two groups: the first group (\*) was on statin, but underwent contralateral carotid artery stenting (CAS), and the second group (\*\*) was treated only with statins. Kadaglou 2010 [18] has divided and analyzed patients into two groups: the first group (^) received atorvastatin 10–20 mg and the second group (^^) atorvastatin 80 mg.
